# Supplementary material for: C-Reactive Protein Mediating Immunopathological Lesions: A Potential Treatment Option for Severe Influenza A Diseases
Source: PubMed Central journal article supplement — eBioMedicine. 2017 Jul 13;22:133–42. doi: 10.1016/j.ebiom.2017.07.010 (PMC5552218; doi:10.1016/j.ebiom.2017.07.010), 2017-07-13

Table s1. Characteristics of influenza A (H5N1, H7N9, H10N8 or H1N1 pdm09) infected patients and healthy volunteers

|                     | Avian influenza virus (n=47) |                    |                    | Mild H1N1 pdm09 patients (n=10) | Healthy volunteers(n=9) |
|---------------------|------------------------------|--------------------|--------------------|---------------------------------|-------------------------|
|                     | H5N1 (n=23)                  | H7N9 (n=21)        | H10N8 (n=3)        |                                 |                         |
| Age                 |                              |                    |                    |                                 |                         |
| Age median (rang)   | 21(2-62) years               | 55.5(24-67) years  | 64(55-75) years    | 25.5 (14-42)years               | 40 (22-52) years        |
| Interquartile range | 16-31 years                  | 45.5-65 years      | 55-75 years        | 14.75-37.25 years               | 27-47 years             |
| 2–14 years          | 4 subjects (17.4%)           | 0subjects (0%)     | 0 subjects (0%)    | 2 subjects (20%)                | 0 subjects (0%)         |
| 15–30 years         | 12 subjects (52.2%)          | 1subjects (4.8%)   | 0 subjects (0%)    | 5 subjects (50%)                | 4 subjects (44.4%)      |
| 31–50 years         | 5 subjects (21.7%)           | 5 subjects (23.8%) | 0 subjects (0%)    | 3 subjects (30%)                | 4 subjects (44.4%)      |
| 51-65 years         | 2 subjects (8.7%)            | 9 subjects (42.9%) | 1 subjects (33.3%) | 0 subjects (0%)                 | 1 subjects (11.2%)      |
| >65 years           | 0 subjects (0%)              | 6 subjects (28.6%) | 2 subjects (66.7%) | 0 subjects (0%)                 | 0 subjects (0%)         |
| Male NO. (%)        | 11(50)                       | 16(76.2)           | 1(33.3)            | 7(70%)                          | 5(55.6%)                |
| Clinical outcome    |                              |                    |                    |                                 |                         |
| Death NO.(%)        | 14(63.6)                     | 10(47.6)           | 2(66.7)            | 0 (0)                           | /                       |

Fig. S1. Sera CK-MB levels in PBS or PR8-challenged mice with or without 1,6-bis PC or/and peramivir treatment. (A) CK-MB kinetics in TC buffer-treated mice. n=3-4 mice per time point (mean  $\pm$  s.e.m.). (B) CK-MB levels were assessed 5 days postinfection. pi n = 3 to 4 mice per group (mean  $\pm$  s.e.m.). No significant differences were noted between different groups (p>0.05 by two-tailed t-test).

Fig. S2.

Sera LDHB levels in PBS or PR8-challenged mice with or without 1,6-bis PC or/and peramivir treatment. (A) LDHB kinetics in TC buffer-treated mice with PR8 infection. n =3 to 4 mice per time point (mean  $\pm$  s.e.m.). (B) LDHB levels were assessed 5 days postinfection. n=3 to 4 mice per group (mean  $\pm$  s.e.m.). \*p<0.05, \*\*p<0.01 ( two-tailed t-test). (C) Correlation between LDHB and CRP levels in TC buffer treated mice with PR8 infection. The Pearson correlation coefficients (r) and p values are provided in each graph.

Fig. S3. Correlation between sera LDHB and weight loss in PR8 challenged mice with TC buffer or 1,6-bis PC or/and peramivir treatment. Correlation between LDHB and weight loss in PR8 challenged mice with TC buffer treatment during 1 to 7 days postinfection (A), 1,6-bis PC or/and peramivir treatment 3 days (B), 5days (C) and 7 days postinfection. The Pearson correlation coefficients (r) and p values are provided in each graph.

Fig. S4. Schematic representation of Tranwell insert co-culture system. H5N1 virus infected A-549 cells seeded onto the lower chamber of a 12-well plate. THP-1 cells were seeded onto Millicell hanging cell culture inserts.

Fig. S1

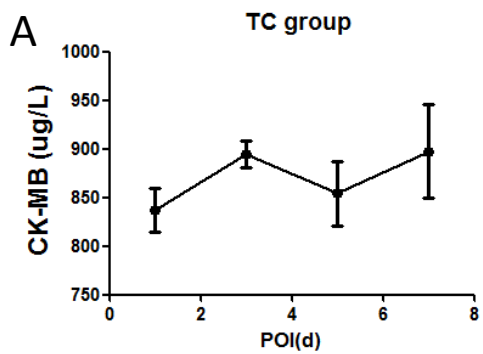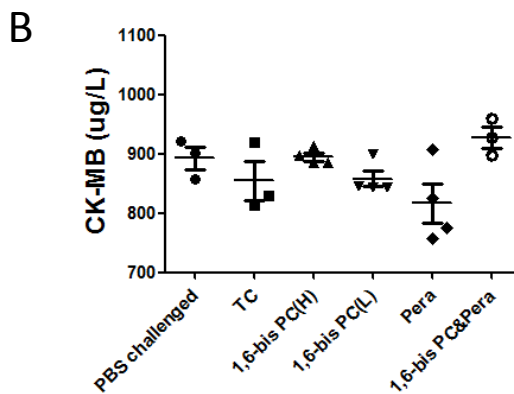

Fig. S2

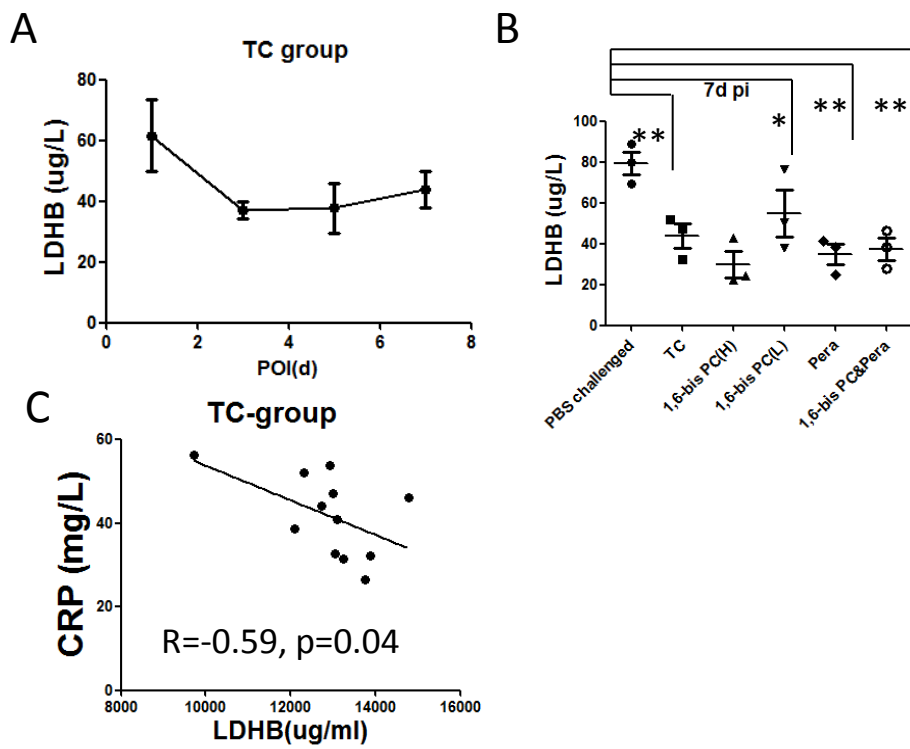

Fig. S3

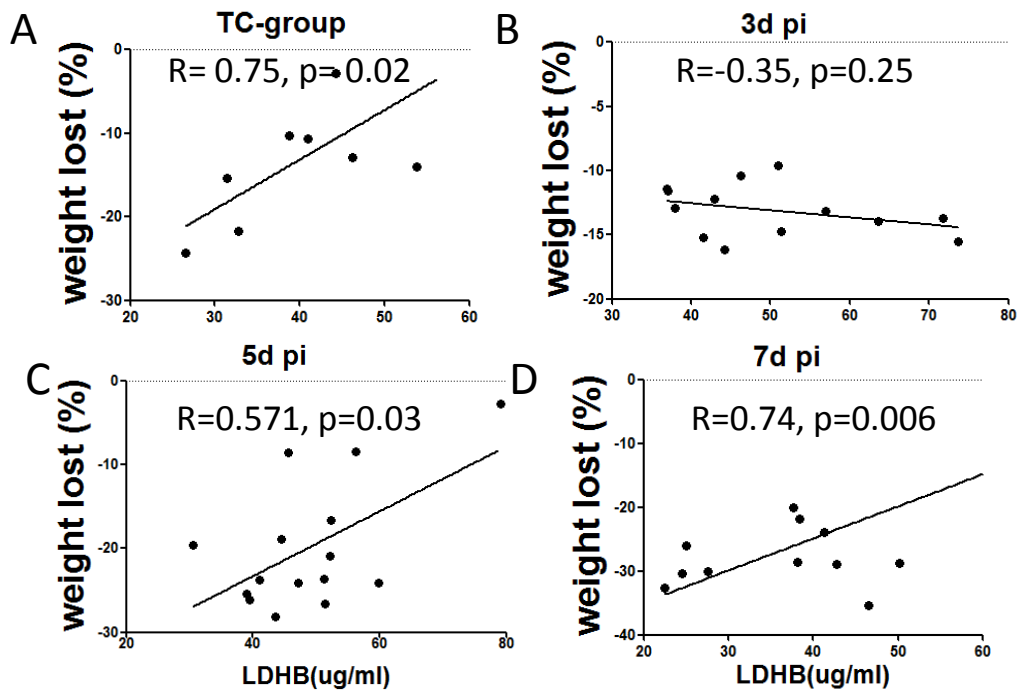

Fig. S4

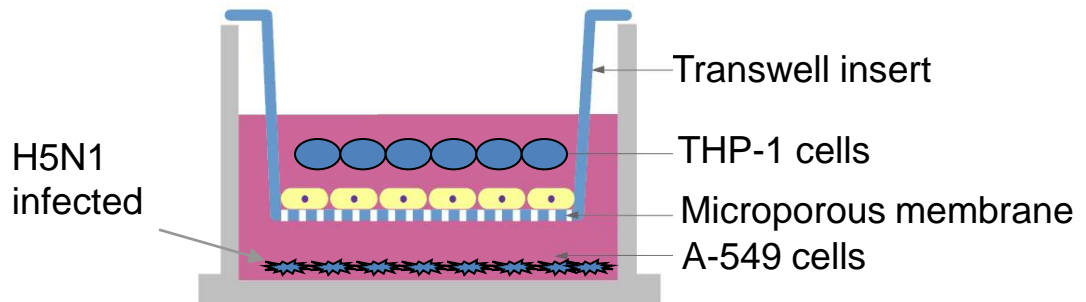

Supplement: mmc1.pdf [file mmc1.pdf]
